# Supplementary material for: Incidence and Associations of Chronic Kidney Disease in Community Participants With Diabetes: A 5-Year Prospective Analysis of the EXTEND45 Study
Source: Oxford University Press journal article supplement (doi:10.2337/dc19-1803), 2020-03-11
Supplement: dc191803supplementarydata.pdf [file dc191803supplementarydata.pdf]

SUPPLEMENTARY DATA

Supplementary Figure 1. Derivation of the study cohort

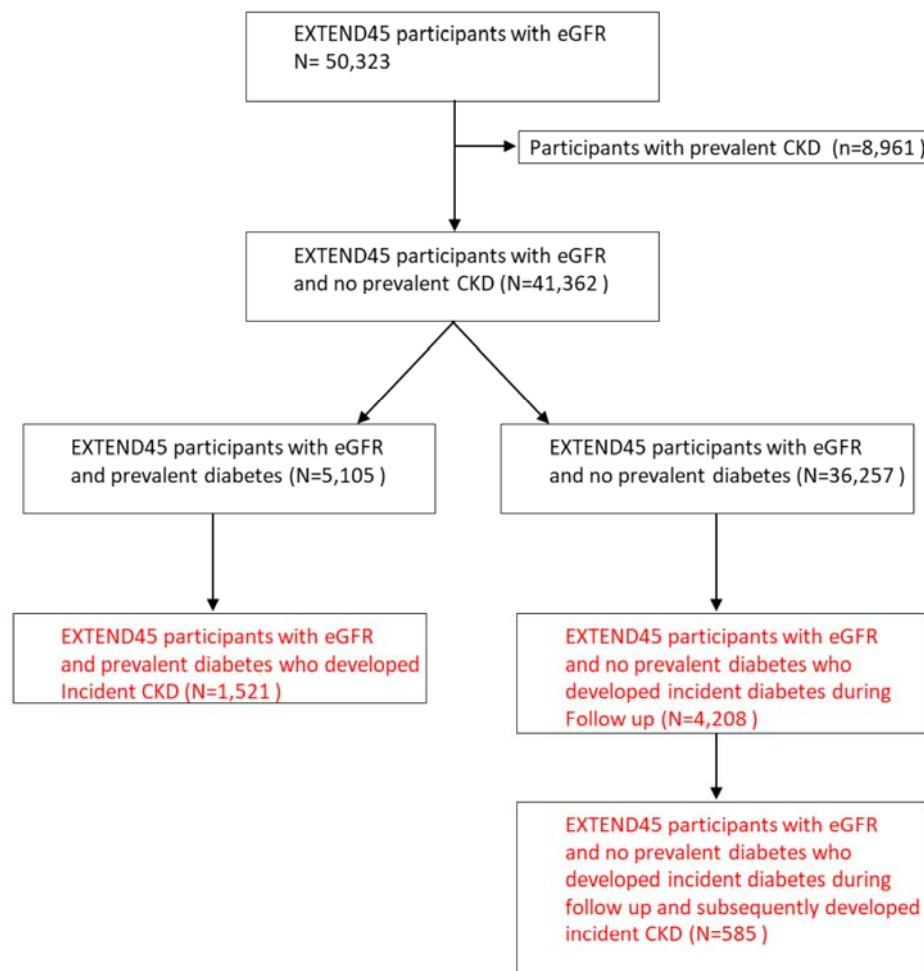

SUPPLEMENTARY DATA

Supplementary Table 1. ICD-10AM codes for the diagnosis of baseline comorbidities

| Disease                      | Relevant ATC codes used to define disease                                                                                                                                                                                                                                    |
|------------------------------|------------------------------------------------------------------------------------------------------------------------------------------------------------------------------------------------------------------------------------------------------------------------------|
| Hypertension                 | C02A, C02C, C02D, C03, C04, C07, C08, C09                                                                                                                                                                                                                                    |
| Hyperlipidaemia              | C10                                                                                                                                                                                                                                                                          |
| Coronary heart disease       | ICD 10 AM codes: I21.0, I21.1, I21.2, I21.3, I21.4, I21.9, I22.0, I22.1, I22.8, I22.9                                                                                                                                                                                        |
| Coronary artery bypass graft | MBS procedure codes 38497-00, 38497-01, 38497-02, 38497-03, 38497-04, 38497-05, 38497-06, 38497-07, 38500-00, 38500-01, 38500-02, 38500-03, 38500-04, 38500-05, 38503-00, 38503-01, 38503-02, 38503-03, 38503-04, 38503-05, 38505-00, 90201-00, 90201-01, 90201-02, 90201-03 |
| Stroke                       | ICD 10 AM codes: I61.0, I61.1, I61.2, I61.3, I61.4, I61.5, I61.6, I61.8, I61.9, I62.0, I62.1, I62.9, I63.0, I63.1, I63.2, I63.3, I63.4, I63.5, I63.6, I63.8, I63.9, I64, I69.0, I69.1, I69.2, I69.3, I69.4, I69.8                                                            |

## SUPPLEMENTARY DATA

Supplementary Appendix Table 2. Minimally adjusted (Age and sex) Cox regression model for development of incident eGFR<60ml/min/1.73m<sup>2</sup>.

| Variable                          | Level                             | Hazard ratio, adjusted for age and sex HR (95%CI) |
|-----------------------------------|-----------------------------------|---------------------------------------------------|
| Age 5 year change                 | Continuous                        | 1.42 (1.39 - 1.45)                                |
| Sex                               | Male                              | Reference                                         |
|                                   | Female                            | 1.08 (0.99 - 1.18)                                |
| Country of birth                  | Australia                         | Reference                                         |
|                                   | Inadequately described or missing | 0.83 (0.55 - 1.26)                                |
|                                   | Europe                            | 0.81 (0.72 - 0.91)                                |
|                                   | NZ and surrounding islands*       | 0.65 (0.45 - 0.96)                                |
|                                   | Africa and the Middle East        | 0.73 (0.53 - 0.99)                                |
|                                   | Asia                              | 0.59 (0.47 - 0.74)                                |
|                                   | Americas                          | 0.66 (0.42 - 1.03)                                |
| Remoteness category vs major city | Major City                        | Reference                                         |
|                                   | Inner Regional                    | 1.30 (1.18 - 1.43)                                |
|                                   | Outer Regional and remote         | 1.50 (1.30 - 1.72)                                |
| Highest Qualification             | No qualification                  | Reference                                         |
|                                   | School certificate                | 1.02 (0.89 - 1.16)                                |
|                                   | High school certificate           | 0.91 (0.77 - 1.08)                                |
|                                   | Trade qualification               | 0.98 (0.83 - 1.15)                                |
|                                   | Certificate/diploma               | 0.87 (0.75 - 1.01)                                |
|                                   | University degree                 | 0.77 (0.67 - 0.90)                                |
| Annual household income           | less then \$5,000 per year        | Reference                                         |

SUPPLEMENTARY DATA

| <b>Variable</b>                                   | <b>Level</b>                           | <b>Hazard ratio, adjusted for age and sex HR (95% CI)</b> |
|---------------------------------------------------|----------------------------------------|-----------------------------------------------------------|
|                                                   | \$5,000-\$9,999 per year               | 1.09 (0.76 - 1.55)                                        |
|                                                   | \$10,000-\$19,999 per year             | 1.25 (0.91 - 1.73)                                        |
|                                                   | \$20,000-\$29,999 per year             | 1.32 (0.94 - 1.84)                                        |
|                                                   | \$30,000-\$39,999 per year             | 1.06 (0.75 - 1.50)                                        |
|                                                   | \$40,000-\$49,999 per year             | 0.95 (0.66 - 1.37)                                        |
|                                                   | \$50,000-\$69,999 per year             | 1.03 (0.72 - 1.46)                                        |
|                                                   | \$70,000 or more per year              | 0.90 (0.64 - 1.26)                                        |
|                                                   | I would rather not answer the question | 1.09 (0.79 - 1.51)                                        |
| <b>Partner status</b>                             | Not in relationship                    | Reference                                                 |
|                                                   | In relationship                        | 0.88 (0.80 - 0.97)                                        |
| <b>Disadvantage index†</b>                        | Q1 Most Disadvantaged                  | Reference                                                 |
|                                                   | Q2                                     | 1.00 (0.88 - 1.14)                                        |
|                                                   | Q3                                     | 0.87 (0.76 - 0.99)                                        |
|                                                   | Q4                                     | 0.82 (0.71 - 0.94)                                        |
|                                                   | Q5 Most Advantaged                     | 0.74 (0.65 - 0.85)                                        |
| <b>Smoking status</b>                             | Never smoker                           | Reference                                                 |
|                                                   | Current smoker                         | 0.89 (0.72 - 1.09)                                        |
|                                                   | Previous smoker                        | 1.06 (0.97 - 1.17)                                        |
| <b>Alcohol consumption (standard drinks/week)</b> | 0                                      | Reference                                                 |
|                                                   | 1-6                                    | 0.86 (0.77 - 0.96)                                        |
|                                                   | 7-13                                   | 0.74 (0.64 - 0.85)                                        |
|                                                   | 14-20                                  | 0.76 (0.64 - 0.91)                                        |

SUPPLEMENTARY DATA

| Variable                                   | Level          | Hazard ratio, adjusted for age and sex HR (95% CI) |
|--------------------------------------------|----------------|----------------------------------------------------|
|                                            | 21+            | 0.84 (0.70 - 1.01)                                 |
| BMI (kg/m <sup>2</sup> )                   | BMI 18.5-<25.0 | Reference                                          |
|                                            | BMI <18.5      | 0.99 (0.56 - 1.76)                                 |
|                                            | BMI 25.0-<30.0 | 1.39 (1.22 - 1.58)                                 |
|                                            | BMI 30.0-<35.0 | 1.66 (1.44 - 1.91)                                 |
|                                            | BMI 35.0-<40.0 | 1.96 (1.64 - 2.35)                                 |
|                                            | BMI >40.0      | 1.98 (1.59 - 2.45)                                 |
| Hypertension                               | No             | Reference                                          |
|                                            | Yes            | 1.88 (1.66 - 2.13)                                 |
| Hyperlipidemia                             | No             | Reference                                          |
|                                            | Yes            | 1.21 (1.10 - 1.33)                                 |
| Coronary Heart Disease                     | No             | Reference                                          |
|                                            | Yes            | 1.31 (1.19 - 1.44)                                 |
| Previous stroke                            | No             | Reference                                          |
|                                            | Yes            | 1.14 (0.96 - 1.34)                                 |
| Cancer                                     | No             | Reference                                          |
|                                            | Yes            | 1.36 (1.19 - 1.56)                                 |
| Depression or Anxiety                      | No             | Reference                                          |
|                                            | Yes            | 1.21 (1.09 - 1.35)                                 |
| Diabetes duration over 5 years             | No             | Reference                                          |
|                                            | Yes            | 1.45 (1.31 - 1.61)                                 |
| Baseline eGFR (ml/min/1.73m <sup>2</sup> ) | Continuous     | 0.93 (0.92 - 0.93)                                 |

\*surrounding Islands: New Caledonia, Papua New Guinea, Solomon Islands, Vanuatu, Cook Islands, Fiji, Niue, Samoa, Tokelau, Tonga, Tuvalu.

## SUPPLEMENTARY DATA

Supplementary Table 3. Baseline characteristics of EXTEND 45 cohort with diabetes and a serum creatinine result compared to those with diabetes without a serum creatinine result.

|                                      | <b>Diabetes and<br/>insufficient serum<br/>creatinine records<br/>(n=11943)</b> | <b>Diabetes and<br/>sufficient serum<br/>creatinine records<br/>(n=12487)</b> | <b>All (n=24430)</b> |
|--------------------------------------|---------------------------------------------------------------------------------|-------------------------------------------------------------------------------|----------------------|
| Age at inception                     |                                                                                 |                                                                               |                      |
| N                                    | 11943                                                                           | 12487                                                                         | 24430                |
| Mean (SD)                            | 66.50 (10.493)                                                                  | 68.07 (10.548)                                                                | 67.30 (10.550)       |
| Median (IQR)                         | 65.89 (58.59; 74.19)                                                            | 67.69 (60.04; 76.00)                                                          | 66.84 (59.30; 75.09) |
| Sex                                  |                                                                                 |                                                                               |                      |
| 45-54 yrs                            | 2041/11943 (17.1%)                                                              | 1905/12487 (15.3%)                                                            | 3946/24430 (16.2%)   |
| 55-64 yrs                            | 3797/11943 (31.8%)                                                              | 3760/12487 (30.1%)                                                            | 7557/24430 (30.9%)   |
| 65-74 yrs                            | 3465/11943 (29.0%)                                                              | 3749/12487 (30.0%)                                                            | 7214/24430 (29.5%)   |
| 75-84 yrs                            | 2237/11943 (18.7%)                                                              | 2601/12487 (20.8%)                                                            | 4838/24430 (19.8%)   |
| 85+ yrs                              | 403/11943 (3.4%)                                                                | 472/12487 (3.8%)                                                              | 875/24430 (3.6%)     |
|                                      |                                                                                 |                                                                               |                      |
| Sex                                  |                                                                                 |                                                                               |                      |
| Male                                 | 6535/11943 (54.7%)                                                              | 6909/12487 (55.3%)                                                            | 13444/24430 (55.0%)  |
| Female                               | 5408/11943 (45.3%)                                                              | 5578/12487 (44.7%)                                                            | 10986/24430 (45.0%)  |
|                                      |                                                                                 |                                                                               |                      |
| Country of origin                    |                                                                                 |                                                                               |                      |
| Inadequately described or missing    | 158/11943 (1.3%)                                                                | 134/12487 (1.1%)                                                              | 292/24430 (1.2%)     |
| Europe                               | 2084/11943 (17.4%)                                                              | 2250/12487 (18.0%)                                                            | 4334/24430 (17.7%)   |
| Australia                            | 8288/11943 (69.4%)                                                              | 8703/12487 (69.7%)                                                            | 16991/24430 (69.5%)  |
| NZ, Melanesia, Micronesia, Polynesia | 247/11943 (2.1%)                                                                | 241/12487 (1.9%)                                                              | 488/24430 (2.0%)     |
| Africa and the Middle East           | 346/11943 (2.9%)                                                                | 311/12487 (2.5%)                                                              | 657/24430 (2.7%)     |

SUPPLEMENTARY DATA

|                                              | <b>Diabetes and<br/>insufficient serum<br/>creatinine records<br/>(n=11943)</b> | <b>Diabetes and<br/>sufficient serum<br/>creatinine records<br/>(n=12487)</b> | <b>All (n=24430)</b> |
|----------------------------------------------|---------------------------------------------------------------------------------|-------------------------------------------------------------------------------|----------------------|
| Asia                                         | 682/11943 (5.7%)                                                                | 701/12487 (5.6%)                                                              | 1383/24430 (5.7%)    |
| Americas                                     | 138/11943 (1.2%)                                                                | 147/12487 (1.2%)                                                              | 285/24430 (1.2%)     |
|                                              |                                                                                 |                                                                               |                      |
| <b>ARIA+ Remoteness</b>                      |                                                                                 |                                                                               |                      |
| Major City                                   | 7581/11766 (64.4%)                                                              | 8156/12344 (66.1%)                                                            | 15737/24110 (65.3%)  |
| Inner Regional                               | 3343/11766 (28.4%)                                                              | 3128/12344 (25.3%)                                                            | 6471/24110 (26.8%)   |
| Outer Regional and remote                    | 842/11766 (7.2%)                                                                | 1060/12344 (8.6%)                                                             | 1902/24110 (7.9%)    |
|                                              |                                                                                 |                                                                               |                      |
| <b>Highest qualification</b>                 |                                                                                 |                                                                               |                      |
| No school certificate or other qualification | 2011/11662 (17.2%)                                                              | 2065/12205 (16.9%)                                                            | 4076/23867 (17.1%)   |
| School or intermediate certificate           | 2675/11662 (22.9%)                                                              | 2970/12205 (24.3%)                                                            | 5645/23867 (23.7%)   |
| Higher school or leaving certificate         | 1125/11662 (9.6%)                                                               | 1212/12205 (9.9%)                                                             | 2337/23867 (9.8%)    |
| Trade or apprenticeship                      | 1484/11662 (12.7%)                                                              | 1556/12205 (12.7%)                                                            | 3040/23867 (12.7%)   |
| Certificate or diploma                       | 2255/11662 (19.3%)                                                              | 2185/12205 (17.9%)                                                            | 4440/23867 (18.6%)   |
| University degree or higher                  | 2112/11662 (18.1%)                                                              | 2217/12205 (18.2%)                                                            | 4329/23867 (18.1%)   |
|                                              |                                                                                 |                                                                               |                      |
| <b>Income</b>                                |                                                                                 |                                                                               |                      |
| less than \$5,000 per year                   | 271/11115 (2.4%)                                                                | 268/11691 (2.3%)                                                              | 539/22806 (2.4%)     |
| \$5,000-\$9,999 per year                     | 799/11115 (7.2%)                                                                | 807/11691 (6.9%)                                                              | 1606/22806 (7.0%)    |
| \$10,000-\$19,999 per year                   | 2379/11115 (21.4%)                                                              | 2337/11691 (20.0%)                                                            | 4716/22806 (20.7%)   |
| \$20,000-\$29,999 per year                   | 1261/11115 (11.3%)                                                              | 1350/11691 (11.5%)                                                            | 2611/22806 (11.4%)   |
| \$30,000-\$39,999 per year                   | 891/11115 (8.0%)                                                                | 889/11691 (7.6%)                                                              | 1780/22806 (7.8%)    |
| \$40,000-\$49,999 per year                   | 753/11115 (6.8%)                                                                | 766/11691 (6.6%)                                                              | 1519/22806 (6.7%)    |

SUPPLEMENTARY DATA

|                                        | <b>Diabetes and<br/>insufficient serum<br/>creatinine records<br/>(n=11943)</b> | <b>Diabetes and<br/>sufficient serum<br/>creatinine records<br/>(n=12487)</b> | <b>All (n=24430)</b> |
|----------------------------------------|---------------------------------------------------------------------------------|-------------------------------------------------------------------------------|----------------------|
| \$50,000-\$69,999 per year             | 925/11115 (8.3%)                                                                | 1040/11691 (8.9%)                                                             | 1965/22806 (8.6%)    |
| \$70,000 or more per year              | 1719/11115 (15.5%)                                                              | 2004/11691 (17.1%)                                                            | 3723/22806 (16.3%)   |
| I would rather not answer the question | 2117/11115 (19.0%)                                                              | 2230/11691 (19.1%)                                                            | 4347/22806 (19.1%)   |
|                                        |                                                                                 |                                                                               |                      |
| <b>Relationship status</b>             |                                                                                 |                                                                               |                      |
| Not in relationship                    | 3280/11869 (27.6%)                                                              | 3422/12397 (27.6%)                                                            | 6702/24266 (27.6%)   |
| In relationship                        | 8589/11869 (72.4%)                                                              | 8975/12397 (72.4%)                                                            | 17564/24266 (72.4%)  |
|                                        |                                                                                 |                                                                               |                      |
| <b>SEIFA quintile</b>                  |                                                                                 |                                                                               |                      |
| Q1 Most Disadvantaged                  | 2945/11668 (25.2%)                                                              | 2887/12252 (23.6%)                                                            | 5832/23920 (24.4%)   |
| Q2                                     | 2648/11668 (22.7%)                                                              | 2303/12252 (18.8%)                                                            | 4951/23920 (20.7%)   |
| Q3                                     | 2079/11668 (17.8%)                                                              | 2212/12252 (18.1%)                                                            | 4291/23920 (17.9%)   |
| Q4                                     | 1811/11668 (15.5%)                                                              | 2023/12252 (16.5%)                                                            | 3834/23920 (16.0%)   |
| Q5 Most Advantaged                     | 2185/11668 (18.7%)                                                              | 2827/12252 (23.1%)                                                            | 5012/23920 (21.0%)   |
|                                        |                                                                                 |                                                                               |                      |
| <b>Smoking status</b>                  |                                                                                 |                                                                               |                      |
| Current smoker                         | 911/11895 (7.7%)                                                                | 847/12443 (6.8%)                                                              | 1758/24338 (7.2%)    |
| Previous smoker                        | 5120/11895 (43.0%)                                                              | 5173/12443 (41.6%)                                                            | 10293/24338 (42.3%)  |
| Never smoker                           | 5864/11895 (49.3%)                                                              | 6423/12443 (51.6%)                                                            | 12287/24338 (50.5%)  |
|                                        |                                                                                 |                                                                               |                      |
| <b>Alcoholic drinks per week</b>       |                                                                                 |                                                                               |                      |
| 0 drinks/week                          | 5244/11543 (45.4%)                                                              | 5417/12077 (44.9%)                                                            | 10661/23620 (45.1%)  |
| 1-6 drinks/week                        | 3036/11543 (26.3%)                                                              | 3170/12077 (26.2%)                                                            | 6206/23620 (26.3%)   |



SUPPLEMENTARY DATA

|                     | <b>Diabetes and<br/>insufficient serum<br/>creatinine records<br/>(n=11943)</b> | <b>Diabetes and<br/>sufficient serum<br/>creatinine records<br/>(n=12487)</b> | <b>All (n=24430)</b> |
|---------------------|---------------------------------------------------------------------------------|-------------------------------------------------------------------------------|----------------------|
| 7-13 drinks/week    | 1525/11543 (13.2%)                                                              | 1642/12077 (13.6%)                                                            | 3167/23620 (13.4%)   |
| 14-20 drinks/week   | 992/11543 (8.6%)                                                                | 1050/12077 (8.7%)                                                             | 2042/23620 (8.6%)    |
| 21+ drinks/week     | 746/11543 (6.5%)                                                                | 798/12077 (6.6%)                                                              | 1544/23620 (6.5%)    |
|                     |                                                                                 |                                                                               |                      |
| <b>BMI category</b> |                                                                                 |                                                                               |                      |
| BMI <18.5           | 66/11020 (0.6%)                                                                 | 76/11506 (0.7%)                                                               | 142/22526 (0.6%)     |
| BMI 18.5-<25.0      | 2193/11020 (19.9%)                                                              | 2271/11506 (19.7%)                                                            | 4464/22526 (19.8%)   |
| BMI 25.0-<30.0      | 4018/11020 (36.5%)                                                              | 4393/11506 (38.2%)                                                            | 8411/22526 (37.3%)   |
| BMI 30.0-<35.0      | 2815/11020 (25.5%)                                                              | 2920/11506 (25.4%)                                                            | 5735/22526 (25.5%)   |
| BMI 35.0-<40.0      | 1220/11020 (11.1%)                                                              | 1158/11506 (10.1%)                                                            | 2378/22526 (10.6%)   |
| BMI >40.0           | 708/11020 (6.4%)                                                                | 688/11506 (6.0%)                                                              | 1396/22526 (6.2%)    |
|                     |                                                                                 |                                                                               |                      |
| <b>BMI</b>          |                                                                                 |                                                                               |                      |
| N                   | 11020                                                                           | 11506                                                                         | 22526                |
| Mean (SD)           | 29.95 (6.198)                                                                   | 29.81 (6.187)                                                                 | 29.88 (6.193)        |
| Median (IQR)        | 29.00 (25.68; 33.07)                                                            | 28.92 (25.71; 32.84)                                                          | 28.98 (25.69; 32.92) |
|                     |                                                                                 |                                                                               |                      |
| <b>Hypertension</b> |                                                                                 |                                                                               |                      |
| No                  | 2723/11943 (22.8%)                                                              | 2749/12487 (22.0%)                                                            | 5472/24430 (22.4%)   |
| Yes                 | 9220/11943 (77.2%)                                                              | 9738/12487 (78.0%)                                                            | 18958/24430 (77.6%)  |
|                     |                                                                                 |                                                                               |                      |
|                     |                                                                                 |                                                                               |                      |
| <b>Lipidemia</b>    |                                                                                 |                                                                               |                      |
| No                  | 4063/11943 (34.0%)                                                              | 3895/12487 (31.2%)                                                            | 7958/24430 (32.6%)   |
| Yes                 | 7880/11943 (66.0%)                                                              | 8592/12487 (68.8%)                                                            | 16472/24430 (67.4%)  |

SUPPLEMENTARY DATA

|                                       | <b>Diabetes and<br/>insufficient serum<br/>creatinine records<br/>(n=11943)</b> | <b>Diabetes and<br/>sufficient serum<br/>creatinine records<br/>(n=12487)</b> | <b>All (n=24430)</b> |
|---------------------------------------|---------------------------------------------------------------------------------|-------------------------------------------------------------------------------|----------------------|
| Heart disease                         |                                                                                 |                                                                               |                      |
| No                                    | 9029/11943 (75.6%)                                                              | 9226/12487 (73.9%)                                                            | 18255/24430 (74.7%)  |
| Yes                                   | 2914/11943 (24.4%)                                                              | 3261/12487 (26.1%)                                                            | 6175/24430 (25.3%)   |
| Cerebrovascular disease               |                                                                                 |                                                                               |                      |
| No                                    | 11078/11943 (92.8%)                                                             | 11665/12487 (93.4%)                                                           | 22743/24430 (93.1%)  |
| Yes                                   | 865/11943 (7.2%)                                                                | 822/12487 (6.6%)                                                              | 1687/24430 (6.9%)    |
| Cancer                                |                                                                                 |                                                                               |                      |
| No                                    | 10957/11943 (91.7%)                                                             | 11388/12487 (91.2%)                                                           | 22345/24430 (91.5%)  |
| Yes                                   | 986/11943 (8.3%)                                                                | 1099/12487 (8.8%)                                                             | 2085/24430 (8.5%)    |
| Depression or Anxiety                 |                                                                                 |                                                                               |                      |
| No                                    | 9775/11943 (81.8%)                                                              | 10238/12487 (82.0%)                                                           | 20013/24430 (81.9%)  |
| Yes                                   | 2168/11943 (18.2%)                                                              | 2249/12487 (18.0%)                                                            | 4417/24430 (18.1%)   |
| Diabetes status at 45 and Up baseline |                                                                                 |                                                                               |                      |
| Prevalent                             | 9233/11943 (77.3%)                                                              | 7126/12487 (57.1%)                                                            | 16359/24430 (67.0%)  |
| Incident                              | 2710/11943 (22.7%)                                                              | 5361/12487 (42.9%)                                                            | 8071/24430 (33.0%)   |
| Diabetes medication                   |                                                                                 |                                                                               |                      |
| None                                  | 5873/11943 (49.2%)                                                              | 7384/12487 (59.1%)                                                            | 13257/24430 (54.3%)  |

SUPPLEMENTARY DATA

|                                  | <b>Diabetes and<br/>insufficient serum<br/>creatinine records<br/>(n=11943)</b> | <b>Diabetes and<br/>sufficient serum<br/>creatinine records<br/>(n=12487)</b> | <b>All (n=24430)</b> |
|----------------------------------|---------------------------------------------------------------------------------|-------------------------------------------------------------------------------|----------------------|
| Mono                             | 3663/11943 (30.7%)                                                              | 3071/12487 (24.6%)                                                            | 6734/24430 (27.6%)   |
| Dual/Triple                      | 1173/11943 (9.8%)                                                               | 920/12487 (7.4%)                                                              | 2093/24430 (8.6%)    |
| Insulin                          | 1234/11943 (10.3%)                                                              | 1112/12487 (8.9%)                                                             | 2346/24430 (9.6%)    |
|                                  |                                                                                 |                                                                               |                      |
| <b>HbA1C available</b>           |                                                                                 |                                                                               |                      |
| No                               | 9984/11943 (83.6%)                                                              | 6984/12487 (55.9%)                                                            | 16968/24430 (69.5%)  |
| Yes                              | 1959/11943 (16.4%)                                                              | 5503/12487 (44.1%)                                                            | 7462/24430 (30.5%)   |
|                                  |                                                                                 |                                                                               |                      |
| <b>HbA1c at baseline</b>         |                                                                                 |                                                                               |                      |
| N                                | 1959                                                                            | 5503                                                                          | 7462                 |
| Mean (SD)                        | 6.95 (1.183)                                                                    | 6.93 (1.153)                                                                  | 6.94 (1.161)         |
| Median (IQR)                     | 6.70 (6.20; 7.40)                                                               | 6.70 (6.20; 7.40)                                                             | 6.70 (6.20; 7.40)    |
| <b>HbA1C Group</b>               |                                                                                 |                                                                               |                      |
| <6.5                             | 739/1959 (37.7%)                                                                | 2235/5503 (40.6%)                                                             | 2974/7462 (39.9%)    |
| 6.5-8.4                          | 1033/1959 (52.7%)                                                               | 2750/5503 (50.0%)                                                             | 3783/7462 (50.7%)    |
| 8.5+                             | 187/1959 (9.5%)                                                                 | 518/5503 (9.4%)                                                               | 705/7462 (9.4%)      |
|                                  |                                                                                 |                                                                               |                      |
| <b>Diabetes vintage (years)</b>  |                                                                                 |                                                                               |                      |
| N                                | 11943                                                                           | 12487                                                                         | 24430                |
| Mean (SD)                        | 1.71 (1.903)                                                                    | 1.93 (2.497)                                                                  | 1.83 (2.229)         |
| Median (IQR)                     | 1.30 (0.00; 3.00)                                                               | 0.10 (0.00; 3.50)                                                             | 0.60 (0.00; 3.10)    |
| <b>Diabetes vintage 5+ years</b> |                                                                                 |                                                                               |                      |
| No                               | 11039/11943 (92.4%)                                                             | 10347/12487 (82.9%)                                                           | 21386/24430 (87.5%)  |

SUPPLEMENTARY DATA

|     | <b>Diabetes and<br/>insufficient serum<br/>creatinine records<br/>(n=11943)</b> | <b>Diabetes and<br/>sufficient serum<br/>creatinine records<br/>(n=12487)</b> | <b>All (n=24430)</b> |
|-----|---------------------------------------------------------------------------------|-------------------------------------------------------------------------------|----------------------|
| Yes | 904/11943 (7.6%)                                                                | 2140/12487 (17.1%)                                                            | 3044/24430 (12.5%)   |
|     |                                                                                 |                                                                               |                      |

SUPPLEMENTARY DATA

| Author                | Title  | Affiliations                                                                                                                     | Email address                                                                      |
|-----------------------|--------|----------------------------------------------------------------------------------------------------------------------------------|------------------------------------------------------------------------------------|
| Louisa Sukkar         | Dr     | The George Institute for Global Health, UNSW, Australia<br>The University of Sydney, School of Public Health, Australia          | lsukkar@georgeinstitute.org.au                                                     |
| Amy Kang              | Dr     | The George institute for Global Health, UNSW, Australia                                                                          | akang@georgeinstitute.org.au                                                       |
| Carinna Hockham       | Dr     | The George institute for Global Health, UNSW, Australia                                                                          | chockham@georgeinstitute.org.au                                                    |
| Tamara Young          | Dr     | The George institute for Global Health, UNSW, Australia                                                                          | tyoung@georgeinstitute.org.au                                                      |
| Min Jun               | A/Prof | The George institute for Global Health, UNSW, Australia                                                                          | mjun@georgeinstitute.org.au                                                        |
| Celine Foote          | Dr     | The George institute for Global Health, UNSW, Australia<br>Concord Repatriation General Hospital, NSW, Australia                 | cfoote@georgeinstitute.org.au                                                      |
| Roberto Pecoits-Filho | Dr     | Pontifícia Universidade Católica do Paraná, Curitiba, Brazil                                                                     | r.pecoits@pucpr.br                                                                 |
| Brendon Neuen         | Dr     | The George institute for Global Health, UNSW, Australia                                                                          | bneuen@georgeinstitute.org.au                                                      |
| Kris Rogers           | Dr     | The George institute for Global Health, UNSW, Australia<br>Graduate School of Health, University of Technology Sydney, Australia | <a href="mailto:krogers@georgeinstitute.org.au">krogers@georgeinstitute.org.au</a> |
| Carol Pollock         | Prof   | Kolling Institute for Medical Research, NSW, Australia                                                                           | carol.pollock@sydney.edu.au                                                        |
| Alan Cass             | Prof   | Menzies School of Health Research, NT, Australia                                                                                 | alan.cass@menzies.edu.au                                                           |
| David Sullivan        | A/Prof | NHMRC Clinical Trials Centre, University of Sydney, NSW, Australia                                                               | David.sullivan@sydney.edu.au                                                       |
| Germaine Wong         | A/Prof | Centre for Kidney Research, University of Sydney, NSW, Australia                                                                 |                                                                                    |
| John Knight           | Prof   | The George institute for Global Health, UNSW, Australia                                                                          | jknight@georgeinstitute.org.au                                                     |
| David Peiris          | Prof   | The George institute for Global Health, UNSW, Australia                                                                          | dpeiris@georgeinstitute.org.au                                                     |
| Martin Gallagher      | Prof   | The George institute for Global Health, UNSW, Australia                                                                          | mgallagher@georgeinstitute.org.au                                                  |
| Meg Jardine           | A/Prof | The George institute for Global Health, UNSW, Australia                                                                          | mjardine@georgeinstitute.org.au                                                    |
